# Supplementary material for: Rational Mutational Analysis of a Multidrug MFS Transporter CaMdr1p of Candida albicans by Employing a Membrane Environment Based Computational Approach
Source: PLoS Comput Biol. 2009 Dec 24;5(12):e1000624. doi: 10.1371/journal.pcbi.1000624 (PMC2789324; doi:10.1371/journal.pcbi.1000624)
Supplement: Table S2 — Comparison of REM and conservation scores. (0.26 MB DOC) [file pcbi.1000624.s003.doc]

| **High REM and High Conservation** | | | | | | |
| --- | --- | --- | --- | --- | --- | --- |
| **Alignment Position** | **MFA** | **RE** | **CaMdr1p Position** | **CaMdr1p Amino acid** | **Conservation** | **Phenotype** |
| 278 | S | 1.022 | 160 | T | 7.0 | RESISTANT |
| 283 | G | 0.710 | 165 | G | 5.0 | SENSITIVE |
| 293 | G | 1.419 | 174 | S | 6.0 | Does not match |
| 295 | L | 0.930 | 176 | M | 7.0 | Does not match |
| 357 | L | 0.723 | 211 | L | 6.0 | RESISTANT |
| 365 | G | 1.475 | 219 | G | 10.0 | SENSITIVE |
| 369 | G | 1.045 | 223 | S | 8.0 | Does not match |
| 416 | G | 0.914 | 256 | G | 5.0 | SENSITIVE |
| 477 | P | 0.704 | 283 | I | 5.0 | Does not match |
|  |  |  |  |  |  |  |
| **Low REM and High Conservation** | | | | | | |
| 891 | L | 0.235 | 448 | I | 4.0 | Does not match |
| 892 | L | 0.211 | 449 | F | 4.0 | Does not match |
| 907 | L | 0.160 | 451 | W | 4.0 | Does not match |
| 908 | L | 0.076 | 452 | S | 4.0 | Does not match |
| 190 | Y | 0.656 | 125 | F | 5.0 | Does not match |
| 282 | L | 0.348 | 164 | I | 5.0 | Does not match |
| 311 | V | 0.222 | 187 | I | 5.0 | Does not match |
| 315 | G | 0.495 | 191 | T | 5.0 | Does not match |
| 375 | V | 0.429 | 229 | G | 5.0 | Does not match |
| 377 | V | 0.253 | 231 | A | 5.0 | Does not match |
| 830 | V | 0.328 | 407 | I | 5.0 | Does not match |
| 841 | L | 0.601 | 415 | K | 5.0 | Does not match |
| 875 | L | 0.236 | 436 | I | 5.0 | Does not match |
| 1021 | V | 0.260 | 472 | G | 6.0 | Does not match |
| 312 | L | 0.586 | 188 | Y | 6.0 | Does not match |
| 324 | L | 0.345 | 200 | I | 6.0 | Does not match |
| 358 | L | 0.416 | 212 | C | 6.0 | Does not match |
| 362 | F | 0.441 | 216 | F | 6.0 | RESISTANT |
| 363 | L | 0.553 | 217 | L | 6.0 | RESISTANT |
| 483 | L | 0.391 | 289 | V | 6.0 | Does not match |
| 668 | L | 0.325 | 363 | M | 6.0 | Does not match |
|  |  |  |  |  |  |  |
| **High REM and Low Conservation** | | | | | | |
| 463 | G | 0.677 | 272 | S | 0.0 | Does not match |
| 506 | S | 0.724 | 298 | T | 1.0 | SENSITIVE |
| 844 | D | 0.739 | 418 | K | 2.0 | Does not match |
| 384 | P | 0.742 | 238 | K | 1.0 | Does not match |
| 329 | A | 0.756 | 205 | V | 4.0 | Does not match |
| 508 | R | 0.929 | 300 | G | 0.0 | Does not match |
| 505 | E | 0.944 | 297 | E | 0.0 | SENSITIVE |
| 468 | F | 0.945 | 277 | F | 4.0 | SENSITIVE |
| 465 | R | 1.049 | 274 | R | 0.0 | RESISTANT |
| 871 | R | 1.174 | 432 | I | 0.0 | Does not match |
| 507 | P | 1.204 | 299 | F | 0.0 | Does not match |
| 870 | R | 1.270 | 431 | F | 0.0 | Does not match |
| 297 | D | 1.277 | 178 | E | 4.0 | SENSITIVE |
| 504 | P | 1.307 | 296 | P | 0.0 | SENSITIVE |
| 306 | R | 1.417 | 184 | R | 2.0 | SENSITIVE |
| 381 | E | 1.727 | 235 | D | 3.0 | SENSITIVE |
| 305 | G | 1.753 | 183 | G | 3.0 | SENSITIVE |
| 361 | R | 1.972 | 215 | R | 3.0 | SENSITIVE |
| 388 | R | 2.088 | 242 | L | 0.0 | Does not match |
| 464 | W | 2.204 | 273 | W | 1.0 | RESISTANT |
| 307 | R | 2.372 | 185 | T | 3.0 | Does not match |
| **Low REM and Low Conservation** | | | | | | |
| 122 | S | 0.2049 | 76 | N | 0.0 |  |
| 124 | L | 0.0977 | 78 | I | 0.0 |  |
| 125 | V | 0.1065 | 79 | V | 0.0 |  |
| 181 | A | 0.3067 | 116 | K | 0.0 |  |
| 184 | G | 0.1643 | 119 | F | 0.0 |  |
| 188 | F | 0.3293 | 123 | I | 2.0 |  |
| 193 | G | 0.2155 | 128 | T | 2.0 |  |
| 195 | I | 0.1376 | 130 | V | 0.0 |  |
| 196 | S | 0.2909 | 131 | Y | 0.0 |  |
| 197 | G | 0.2188 | 132 | M | 0.0 |  |
| 200 | V | 0.2271 | 135 | A | 0.0 |  |
| 201 | I | 0.1728 | 136 | V | 0.0 |  |
| 202 | L | 0.1326 | 137 | Y | 0.0 |  |
| 203 | L | 0.1901 | 138 | T | 0.0 |  |
| 204 | I | 0.3175 | 139 | P | 0.0 |  |
| 268 | L | 0.1826 | 151 | G | 0.0 |  |
| 270 | T | 0.3352 | 153 | V | 0.0 |  |
| 271 | S | 0.2458 | 154 | V | 0.0 |  |
| 273 | T | 0.3513 | 156 | T | 2.0 |  |
| 277 | V | 0.2944 | 159 | L | 2.0 |  |
| 281 | L | 0.2137 | 163 | V | 0.0 |  |
| 284 | A | 0.2283 | 166 | Y | 2.0 |  |
| 285 | L | 0.2799 | 167 | G | 3.0 |  |
| 290 | L | 0.3595 | 172 | V | 3.0 |  |
| 294 | P | 0.3367 | 175 | P | 1.0 |  |
| 313 | L | 0.2373 | 189 | I | 0.0 |  |
| 316 | L | 0.1616 | 192 | L | 3.0 |  |
| 323 | S | 0.3374 | 199 | Q | 2.0 |  |
| 368 | V | 0.2556 | 222 | A | 0.0 |  |
| 371 | A | 0.1513 | 225 | C | 2.0 | **RESISTANT** |
| 374 | V | 0.2771 | 228 | T | 3.0 |  |
| 385 | K | 0.3088 | 239 | F | 1.0 |  |
| 391 | A | 0.2509 | 245 | G | 0.0 |  |
| 392 | L | 0.2440 | 246 | L | 0.0 |  |
| 400 | I | 0.1731 | 248 | A | 2.0 | **RESISTANT** |
| 413 | I | 0.2133 | 253 | A | 3.0 | **RESISTANT** |
| 414 | T | 0.3110 | 254 | V | 1.0 | **RESISTANT** |
| 417 | I | 0.2493 | 257 | P | 0.0 |  |
| 421 | A | 0.3518 | 261 | P | 2.0 |  |
| 472 | L | 0.2574 | 278 | W | 2.0 |  |
| 474 | A | 0.0897 | 280 | M | 0.0 |  |
| 478 | A | 0.3421 | 284 | S | 3.0 |  |
| 488 | F | 0.2197 | 294 | T | 0.0 |  |
| 510 | L | 0.3162 | 302 | T | 0.0 |  |
| 535 | L | 0.2966 | 311 | L | 0.0 |  |
| 536 | K | 0.3020 | 312 | R | 0.0 |  |
| 606 | L | 0.1147 | 336 | L | 0.0 |  |
| 607 | L | 0.1194 | 337 | I | 0.0 |  |
| 637 | L | 0.3177 | 348 | T | 0.0 |  |
| 638 | F | 0.3398 | 349 | V | 0.0 |  |
| 639 | R | 0.2845 | 350 | M | 0.0 |  |
| 640 | K | 0.2025 | 351 | E | 0.0 |  |
| 641 | P | 0.2239 | 352 | P | 1.0 | RESISTANT |
| 642 | L | 0.2073 | 353 | V | 0.0 |  |
| 653 | L | 0.2429 | 356 | L | 1.0 |  |
| 654 | A | 0.2081 | 357 | I | 1.0 |  |
| 670 | L | 0.2656 | 365 | Y | 0.0 |  |
| 676 | F | 0.3010 | 371 | F | 3.0 |  |
| 678 | G | 0.3136 | 373 | E | 0.0 |  |
| 692 | P | 0.1950 | 387 | L | 0.0 |  |
| 693 | S | 0.1277 | 388 | V | 2.0 |  |
| 694 | I | 0.2783 | 389 | E | 1.0 |  |
| 695 | F | 0.2495 | 390 | L | 3.0 |  |
| 697 | S | 0.2209 | 392 | T | 0.0 |  |
| 820 | A | 0.2507 | 397 | I | 0.0 |  |
| 823 | L | 0.0970 | 400 | G | 2.0 |  |
| 824 | S | 0.1492 | 401 | I | 2.0 |  |
| 827 | F | 0.1595 | 404 | A | 2.0 |  |
| 828 | G | 0.3276 | 405 | A | 0.0 |  |
| 872 | P | 0.2871 | 433 | P | 1.0 |  |
| 873 | L | 0.3267 | 434 | I | 1.0 |  |
| 874 | L | 0.2568 | 435 | A | 2.0 |  |
| 878 | L | 0.1754 | 439 | G | 3.0 |  |
| 884 | A | 0.2387 | 445 | G | 3.0 |  |
| 893 | G | 0.1384 | 450 | G | 3.0 |  |
| 909 | G | 0.2394 | 453 | A | 2.0 |  |
| 1008 | L | 0.1607 | 459 | W | 0.0 | RESISTANT |
| 1009 | L | 0.3375 | 460 | V | 0.0 |  |
| 1010 | G | 0.2073 | 461 | G | 3.0 |  |
| 1019 | L | 0.1433 | 470 | A | 0.0 |  |
| 1020 | F | 0.3330 | 471 | S | 0.0 |  |
| 1022 | A | 0.1704 | 473 | A | 1.0 |  |
| 1024 | F | 0.2688 | 475 | L | 3.0 |  |
| 1025 | A | 0.2706 | 476 | I | 3.0 |  |
| 1026 | L | 0.1750 | 477 | F | 3.0 |  |
| 1027 | G | 0.1134 | 478 | Q | 3.0 |  |
| 1028 | I | 0.3039 | 479 | T | 3.0 |  |
| 1045 | I | 0.1866 | 484 | M | 0.0 |  |
| 1048 | L | 0.2471 | 487 | S | 0.0 |  |
| 1051 | S | 0.3537 | 490 | P | 3.0 |  |
| 1053 | I | 0.2488 | 492 | Y | 2.0 |  |
| 1065 | A | 0.2432 | 496 | V | 0.0 |  |
| 1068 | L | 0.2521 | 499 | S | 2.0 |  |
| 1070 | L | 0.2341 | 501 | D | 2.0 |  |
| 1071 | G | 0.2641 | 502 | L | 0.0 |  |
| 1074 | A | 0.3289 | 505 | S | 0.0 |  |
| 1082 | F | 0.1957 | 513 | L | 3.0 |  |
| 1086 | G | 0.2605 | 517 | P | 0.0 |  |
| 1113 | W | 0.2626 | 531 | W | 1.0 |  |
| 1115 | G | 0.1542 | 533 | S | 0.0 |  |
| 1116 | P | 0.2135 | 534 | S | 3.0 |  |
| 1124 | A | 0.2732 | 542 | V | 3.0 |  |
| 1127 | A | 0.1786 | 545 | A | 3.0 |  |
| 1129 | L | 0.2746 | 547 | P | 3.0 |  |
| 1133 | L | 0.2337 | 551 | Y | 2.0 |  |
| 1135 | V | 0.3320 | 553 | N | 0.0 |  |
| 1143 | L | 0.3442 | - | - | 0.0 |  |
| 1144 | E | 0.3487 | 561 | S | 0.0 |  |
| 1146 | I | 0.2280 | 563 | Y | 0.0 |  |
| 122 | S | 0.2049 | 76 | N | 0.0 |  |
| 124 | L | 0.0977 | 78 | I | 0.0 |  |
| 125 | V | 0.1065 | 79 | V | 0.0 |  |
| 181 | A | 0.3067 | 116 | K | 0.0 |  |

**Table S2. Comparison of REM and conservation scores.** The top thirty alignment positions from both the tables were short-listed. Phenotypes are mentioned wherever known. The comparison shows that REM is a better index of the functional relevance of a particular alignment position. As control, the residues which have low REM and low conservation were shortlisted from the complete alignment and are shown in the table. The positions in the vicinity of the selected High REM positions are marked in bold and their phenotypes are also mentioned. (MFA-Most frequent amino acid in the respective alignment position in the MSA. ‘Does not match’ indicates where the MFA does not match the residue in CaMdr1p at a particular alignment position).
